# Supplementary material
Source: Elsevier journal article supplement (https://rcastoragev2.blob.core.windows.net/323e548ba4a441b908d243cef6d46785/mmc1.pdf)

Figure S1

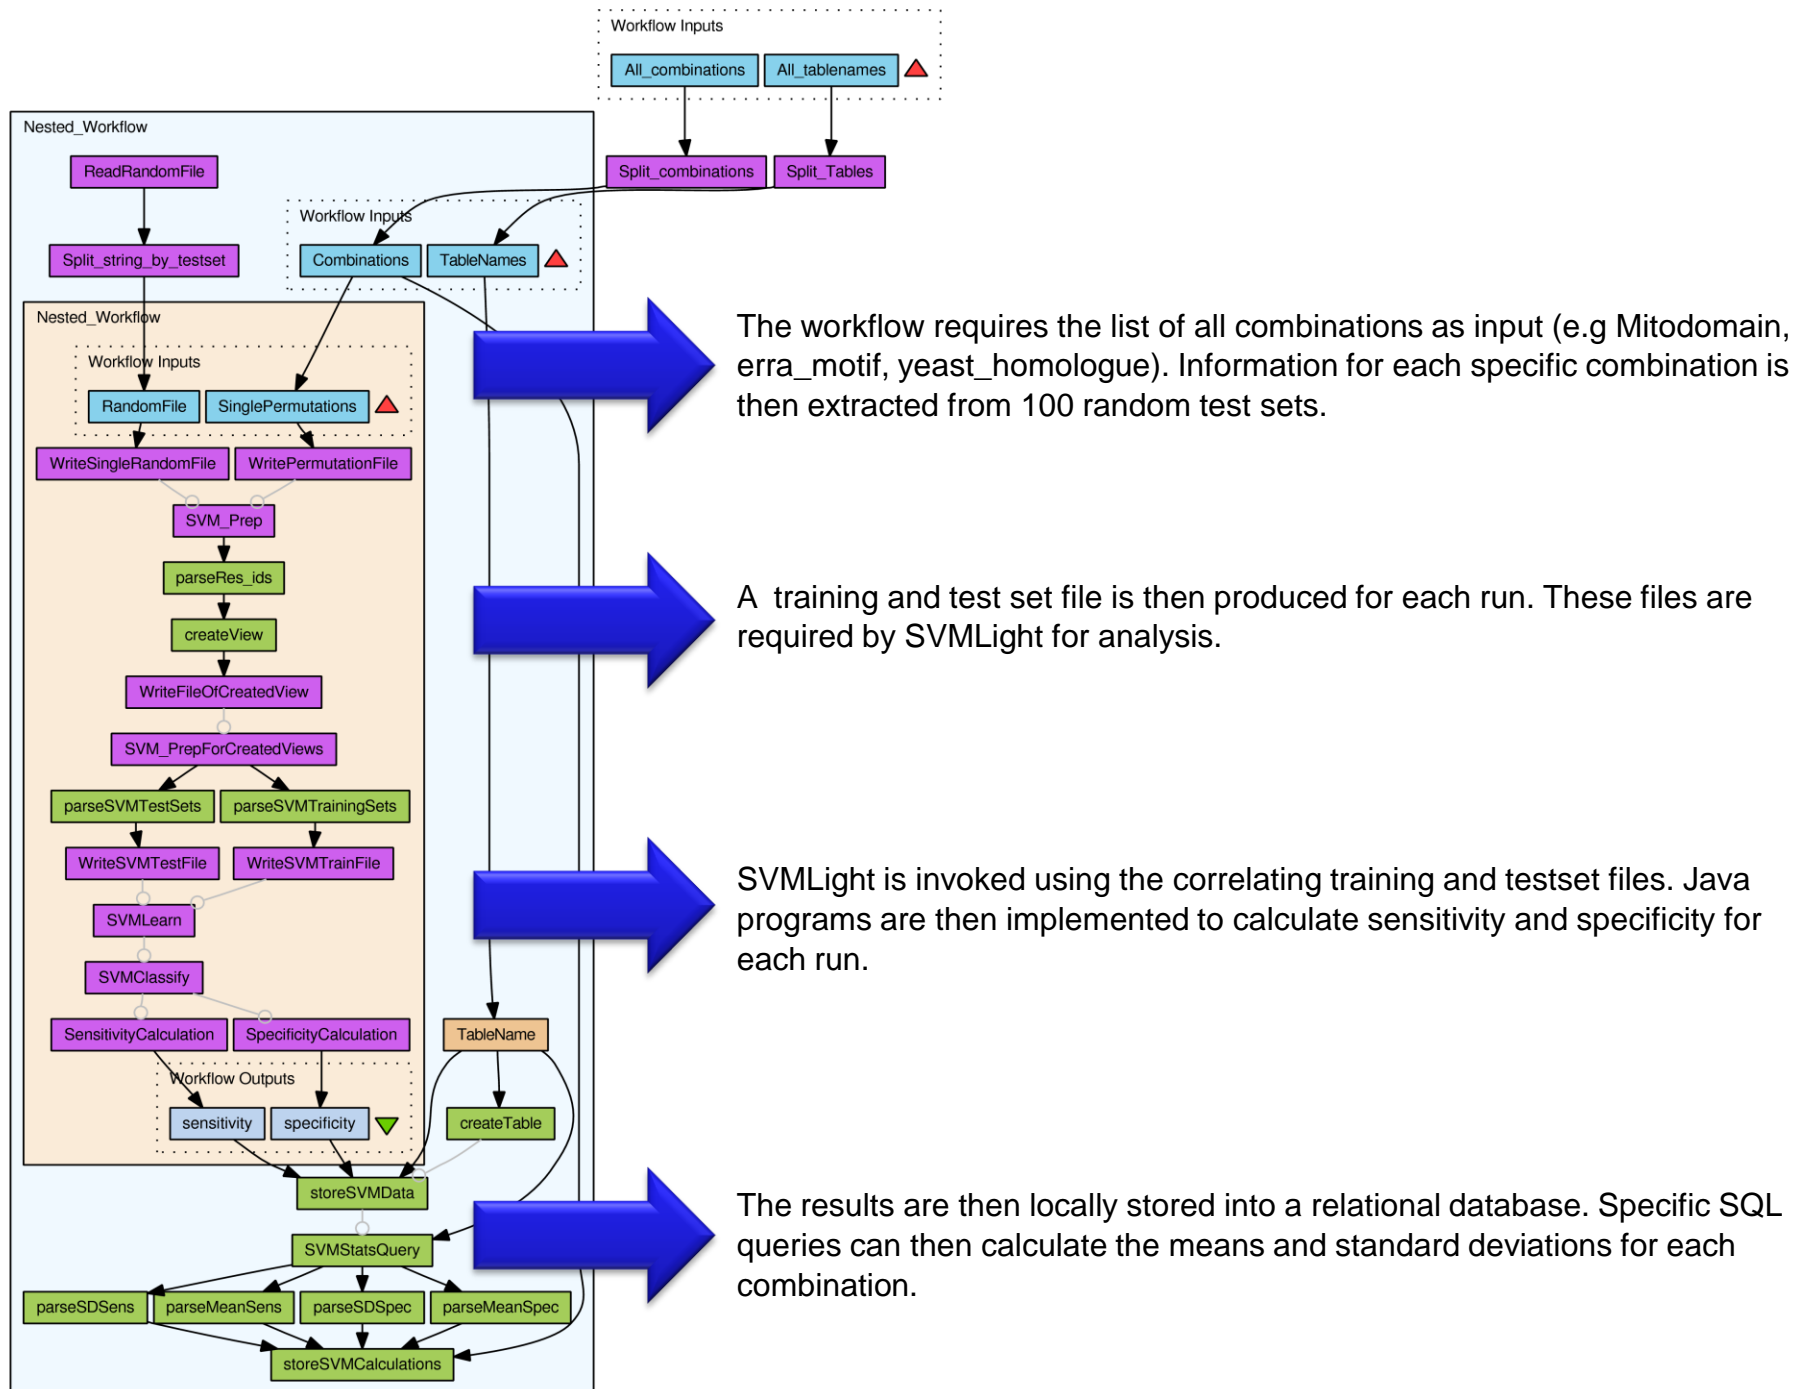

Figure S2

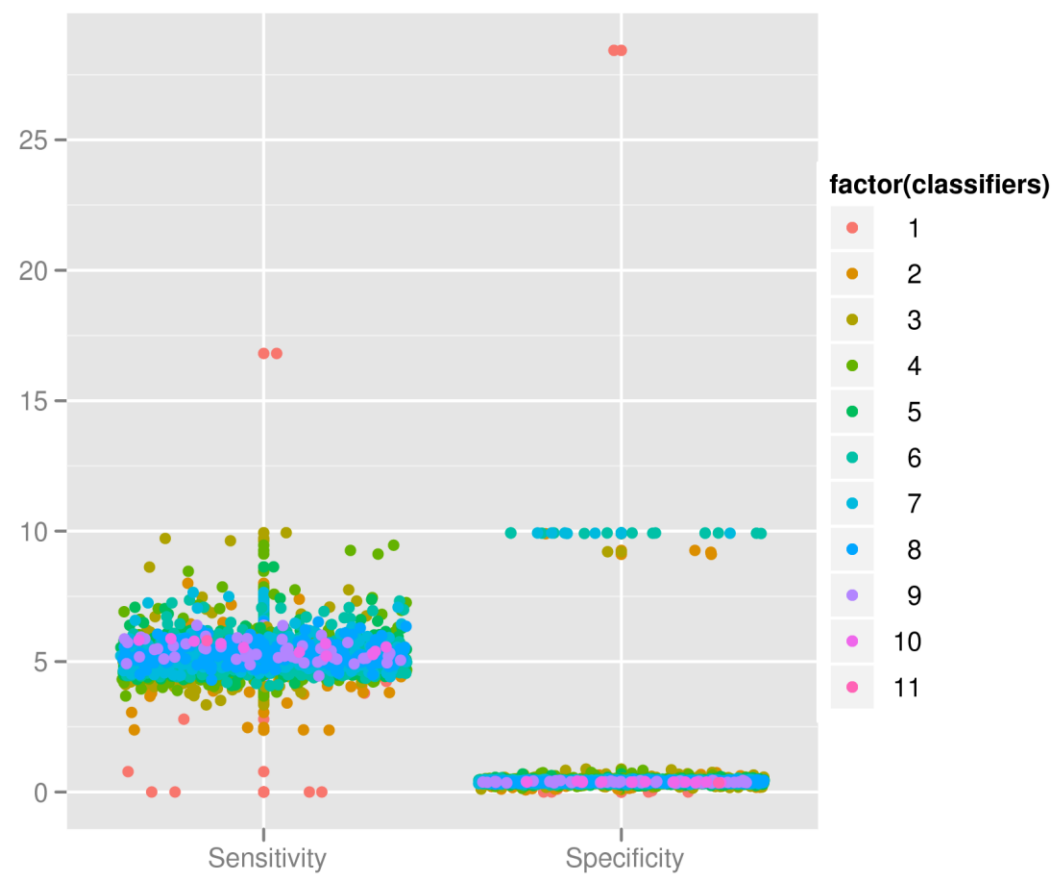

Figure S3

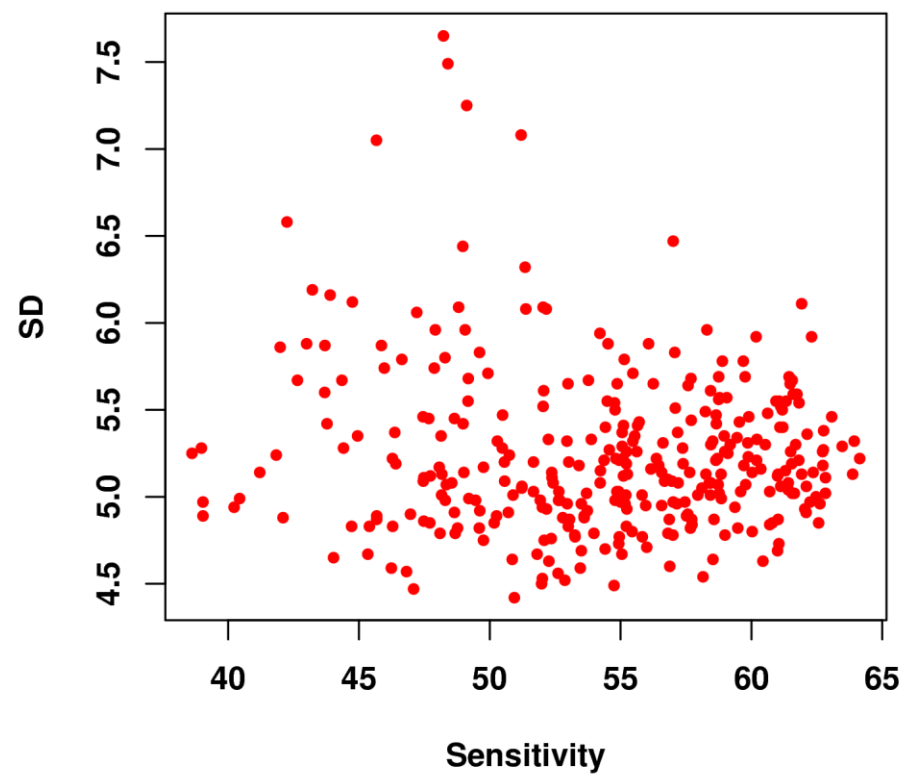

Supplement: mmc1 [file mmc1.pdf]
